## ***In silico* and *in vitro* drug screening identifies new therapeutic approaches for Ewing sarcoma**

**Ziyan Y. Pessetto<sup>1</sup>, Bin Chen<sup>2</sup>, Hani Alturkmani<sup>1</sup>, Stephen Hyter<sup>1</sup>, Colleen A. Flynn<sup>3</sup>, Michael Baltezor<sup>3</sup>, Yan Ma<sup>1</sup>, Howard G. Rosenthal<sup>4</sup>, Kathleen A. Neville<sup>5</sup>, Scott J. Weir<sup>4,6,7</sup>, Atul J. Butte<sup>2</sup>, Andrew K. Godwin<sup>1,4</sup>**

<sup>1</sup>Departments of Pathology and Laboratory Medicine, Toxicology and Therapeutics, University of Kansas Medical Center, Kansas City, KS, USA

<sup>2</sup>Institute for Computational Health Sciences, University of California, San Francisco, San Francisco, CA, USA

<sup>3</sup>Lead Development Optimization Shared Resource, University of Kansas Cancer Center, Biotechnology Innovation and Optimization Center, Lawrence, KS, USA

<sup>4</sup>University of Kansas Cancer Center, University of Kansas Medical Center, Kansas City, KS, USA

<sup>5</sup>Department of Pediatrics, Arkansas Children's Hospital, Little Rock, AR, USA

<sup>6</sup>Department of Pharmacology, University of Kansas Medical Center, Kansas City, KS, USA

<sup>7</sup>Institute for Advancing Medical Innovation, University of Kansas Medical Center, Kansas City, KS, USA

**Correspondence to:** Andrew K. Godwin, **email:** agodwin@kumc.edu

**Keywords:** Ewing sarcoma, drug repurposing, auranofin, ganetespib, high-throughput screening

**Received:** July 22, 2016

**Accepted:** October 14, 2016

**Published:** November 16, 2016

### **ABSTRACT**

**The long-term overall survival of Ewing sarcoma (EWS) patients remains poor; less than 30% of patients with metastatic or recurrent disease survive despite aggressive combinations of chemotherapy, radiation and surgery. To identify new therapeutic options, we employed a multi-pronged approach using *in silico* predictions of drug activity via an integrated bioinformatics approach in parallel with an *in vitro* screen of FDA-approved drugs. Twenty-seven drugs and forty-six drugs were identified, respectively, to have anti-proliferative effects for EWS, including several classes of drugs in both screening approaches. Among these drugs, 30 were extensively validated as mono-therapeutic agents and 9 in 14 various combinations *in vitro*. Two drugs, auranofin, a thioredoxin reductase inhibitor, and ganetespib, an HSP90 inhibitor, were predicted to have anti-cancer activities *in silico* and were confirmed active across a panel of genetically diverse EWS cells. When given in combination, the survival rate *in vivo* was superior compared to auranofin or ganetespib alone. Importantly, extensive formulations, dose tolerance, and pharmacokinetics studies demonstrated that auranofin requires alternative delivery routes to achieve therapeutically effective levels of the gold compound. These combined screening approaches provide a rapid means to identify new treatment options for patients with a rare and often-fatal disease.**

### **INTRODUCTION**

Ewing sarcoma (EWS) is a rare, aggressive malignancy of neuroectodermal origin that develops in bones and, less often, in soft tissues [1]. EWS is the second most common bone malignancy after osteosarcoma [2], and it frequently develops in pediatric and young adult age groups [3]. The incidence of EWS is about 3/1,000,000 cases per year, with a clear predominance

in Caucasians. The American Cancer Society estimates that 225 children and adolescents are diagnosed with EWS in North America each year. The most significant prognostic factor for patients with EWS is the presence or absence of overt metastatic disease. Metastatic disease is most commonly located in the lungs (30%), bone and/or bone marrow (30%), and lung metastasis combined with bone and/or bone marrow metastasis (20%) [4]. Other clinical prognostic factors have been found, such as tumor

location, tumor size, patient age, and pattern of metastasis [5]. About 25% of patients show distant metastasis at the time of diagnosis [6]. More than 90% of the EWS tumors harbor an (11;22) (q24;q12) translocation that encodes for a EWS/FLI1 fusion protein [7], which functions as a potent oncoprotein with an abnormal transcription factor behavior that leads to aberrant expression of numerous genes and contributes to tumorigenicity [8, 9].

The current therapies for patients with metastatic EWS are limiting. The introduction of the multimodal approach in the management of EWS resulted in a significant increase in survival for EWS patients. Adding chemotherapy to the combination of surgery and radiation is essential in treating EWS due to the presence of residual tumor after resection and micro-metastasis even in localized disease [10]. The front-line chemotherapy for EWS is alternating vincristine/doxorubicin/cyclophosphamide (VDC) and ifosfamide/etoposide (IE) [11]. Patients with localized tumors currently have a 75% survival rate compared to 10% before the introduction of chemotherapy. Unfortunately, patients with metastatic disease (about 25% of patients at the time of diagnosis) still do poorly with a 20% 5-year-survival rate [7, 10, 12]. A high percentage of patients develop metastasis and resistance to the current treatment regimens [10], which warrants further exploration of possible therapeutic targets.

## RESULTS

### *In silico* prediction

The systems approach to repurposing drugs has recently gained momentum in pursuit of new treatments for various diseases [13, 14]. The basic concept is to use integrated bioinformatics to identify drugs that can reverse the gene expression of a given disease. We extended the concept and proposed three computational approaches to predict drugs for EWS from a drug library consisting of 1,335 drugs (Figure 1). First, the top 20 negatively scored drug hits that are predicted to reverse the EWS disease gene expression were selected (including 13 distinct drugs). Second, the top 20 positively scored drug hits (including 18 distinct drugs) that share a gene expression profile similar to the pattern obtained by the silencing of *EWS/FLI1* via RNAi approaches (siEWS/FLI1) were identified. Third, the top 20 drug hits (including 14 distinct drugs) that are predicted to reverse the derived drug resistance expression signature were selected. Some drug hits were repeated within each approach or shared among multiple approaches. For example, the HSP90 inhibitors, geldanamycin and tanespimycin (17-(allylamino)-17-demethoxygeldanamycin, 17-AAG), appeared 2 and 4 times, respectively, in the list of the resistance-based approach. MS-275, an HDAC inhibitor, appeared in both disease-based and siRNA-based

approach. In total, 43 distinct drugs were predicted using the three computational approaches. Twenty-seven of these drugs were then manually selected for extensive *in vitro* validation (Figure 1).

### *In vitro* screening

We screened, in parallel to the three computational approaches, an FDA-approved drug library containing 2,316 drugs (1,536 unique chemical entities). A panel of sarcoma cell lines including 3 EWS lines, each with a confirmed *EWS* gene rearrangements [15] and two non-tumorigenic and one benign osteoid osteoma control cell lines (Hs 822.T., Hs 863.T., and Hs 919.T.), respectively were used (Tables 1 and 2). Hs 822.T. and Hs 863.T. were previously reported to be of Ewing sarcoma origin [16]; however, FISH analysis and molecular characterization by our group failed to identify an *EWS* gene rearrangement (unpublished data). The drug screening study protocol employed is summarized in Supplementary Table S1. In total, 78 drugs showed activity in at least one or more EWS cell lines; however, 29 of the compounds were cytotoxic to the non-tumorigenic control cells while 3 drugs (vincristine, doxorubicin and etoposide) are currently prescribed for the treatment of EWS and were eliminated from further consideration. Overall, forty-five (45) drugs were identified in the primary screen, including auranofin (Ridaura®) (Table 2) and were nominated for further validation.

### Post screen analysis and secondary screen

Next, the predicted and library screened drugs were extensively validated. The *in vitro* activities of each drug hit were evaluated in an expanded panel of EWS cell lines (either the *EWS/FLI1* or the *EWS/ERG* fusion) (Table 1) and confirmed employing 12-point dose-response curves ranging from 50  $\mu\text{mol/L}$  to 1  $\text{nmol/L}$ , with triplicate sampling (Table 3). As mentioned above, one of the most notable drug hits discovered through both the *in silico* and *in vitro* drug screening approaches was auranofin. Based on this finding, we subsequently screened auranofin against six other marketed or investigational anticancer drug hits (carfilzomib, elesclomol, bortezomib, geldanamycin, AUY922, and ganetespib, Supplementary Figures S1–S5 and Figure 2). These drugs were chosen based on their known mechanisms and safety profiles. We also tested the synergy between these drug hits (Supplementary Figures S6–S11). Several classes of agents were found to be highly synergistic in combination with auranofin, including the next generation HSP90 inhibitors ganetespib (STA-9090; Synta Pharmaceuticals) and AUY922 (Novartis). These independent results peaked our interest since geldanamycin and its derivative 17-AAG were repeatedly identified in our integrated bioinformatics studies. Since the development of geldanamycin and 17-AAG



**Table 1: EWS fusion status for EWS and non-tumorigenic cell lines**

| Cell Line | EWS Fusion Status  |
|-----------|--------------------|
| A673      | EWS/FLI1 Type I    |
| TC-71     | EWS/FLI1 Type I    |
| SK-ES-1   | EWS/FLI1 Type II   |
| RD-ES     | EWS/FLI1 Type II   |
| CHLA-258  | EWS/FLI1 Type III  |
| COG-E-352 | EWS/ERG fusion     |
| Hs 822.T  | No fusion detected |
| Hs 863.T  | No fusion detected |
| Hs 919.T  | No fusion detected |

and the sequence of the breakpoint of *EWS-FLI1* type I mRNA (siBPEF1) respectively. To examine whether the siRNAs could abolish the expression of *EWS-FLI1*, the effects of siRNAs on the protein levels of *EWS-FLI1* were analyzed by western blot (see Supplementary methods). Treatment with siFLI1-#3, or to a greater extent, siBPEF1, significantly decreased the EWS-FLI1 protein expression in A673 cells with type I fusion at 48h after transfection, as compared with the siControl treatment (Figure 3A). In addition, A673 cells became resistant to auranofin after the silencing of *EWS-FLI1* gene, as evidenced by the significant increase in the IC<sub>50</sub> values of A673 cells treated by siFLI1-#3 or siBPEF1 followed by the incubation of auranofin for 72 h (siFLI1-#3 and siBPEF1 IC<sub>50</sub> values are above 1.0 μmol/L), as compared with the counterpart of the siControl group (siControl, IC<sub>50</sub> = 0.27 ± 0.02 μmol/L) (Figure 3B). These experiments further validate the *in silico* prediction and suggest a need to further assess its potential clinical utility as an anti-cancer agent.

### Defining maximum tolerated dose

Ridaura® (auranofin) is typically delivered orally (capsules containing 3 mg auranofin) and has been repurposed in several clinical trials with limited results (*i.e.*, clinicaltrials.gov identifier: NCT01419691, NCT02126527, and NCT02126527). We hypothesized that the oral bioavailability of auranofin (gold) might explain the difference in its anti-cancer activities *in vitro* versus in clinical trials given that the published product monograph for Ridaura® capsules stated that the human oral bioavailability of gold from Ridaura® capsules is only approximately 25% [18, See Supplementary Material Reference 18]. Additionally, the ability to increase the dose of auranofin to achieve higher blood concentrations of gold was limited by dose-limiting gastrointestinal side effects (diarrhea, loose stools, nausea, vomiting and abdominal cramps) [18, 19]. For our studies we dosed BALB/c mice orally at 10 mg/Kg with different formulations of

auranofin suspensions prepared in 0.5% hydroxypropyl methyl cellulose to help assure dose uniformity. We compared the ground contents of Ridaura® capsules, the ground pure auranofin drug substance, auranofin suspension containing 0.5% sodium lauryl sulfate (a surfactant), auranofin suspensions with the pH adjusted to pH = 1, 4 and 7, auranofin suspension dosed into fasted versus high fat diet mice and finally a solution of auranofin prepared in 5% dimethyl sulfoxide (DMSO) with a pH = 1. Pharmacokinetic studies were conducted on all of these formulation variations. Blood samples from 3 mice at each time point (0, 1, 2, 4, 8, 12, 24, 48 and 96 hours) and the whole blood was assayed by ICPMS for gold.

We additionally studied dose accumulation of the gold by comparing a formulation of Ridaura® capsule contents as described above and dosing at 10 mg/Kg single dose versus dosing the mice once daily for 5 days. The PK study compared the gold content in whole blood samples as described above for the single dose versus the gold content in whole blood samples from the multidose arm with whole blood collected at the end of each 24 hour dosing period before the next dose (24, 48, 72, 96 and 120 hours) and then whole blood collected every 24 hours for 5 additional days (144, 168, 192, 216 and 240 hours) and assayed for gold content. The results of these formulation and PK studies are shown in Supplementary Table S2.

The formulation studies demonstrated that we were unable to alter the amount of auranofin (gold) absorbed through formulation variations. These findings led us to develop and assess injectable (*i.v.* and *i.p.*) formulations of auranofin. By defining maximum tolerated dose (MTD) following *i.v.* and *i.p.* administration of solution and suspension formulations of auranofin, our intent was to evaluate auranofin alone and in combination with ganetespib at MTD in mouse xenograft studies using the more convenient *i.p.* route of administration. Following administration of the solution formulation of auranofin *i.v.* and *i.p.*, the maximum tolerated dose was estimated at 1 mg/kg and 6 mg/kg, respectively. Following a single

**Table 2: *In vitro* drug screen hits**

| Classes                                                                                             | Drug                                                                           | % Inhibition |       |         |      |
|-----------------------------------------------------------------------------------------------------|--------------------------------------------------------------------------------|--------------|-------|---------|------|
|                                                                                                     |                                                                                | Hs 919.T.    | RD-ES | SK-ES-1 | A673 |
| Camptothecins                                                                                       | Topotecan HCl                                                                  | < 50         | 97    | 96      | 97   |
| Camptothecins                                                                                       | Irinotecan Hydrochloride                                                       | < 50         | 99    | 98      | 83   |
| Alkylating agents                                                                                   | Melphalan                                                                      | < 50         | 95    | 91      | < 50 |
| Taxanes                                                                                             | Paclitaxel/Taxol                                                               | < 50         | 97    | 96      | 96   |
| Gold compound                                                                                       | Auranofin                                                                      | < 50         | 100   | 99      | 98   |
| Estrogen                                                                                            | Estradiol                                                                      | < 50         | < 50  | < 50    | 65   |
| 17-alpha-alkylated anabolic steroid                                                                 | Methyltestosterone                                                             | < 50         | 73    | < 50    | < 50 |
| Acetanilides; Steroids and Steroid Derivatives                                                      | Vorinostat                                                                     | < 50         | 61    | < 50    | < 50 |
| Nitrofurans                                                                                         | Nitrofurazone/Nitrofurantoin                                                   | < 50         | 52    | 72      | 52   |
| Diphenhydramines                                                                                    | Clemastine                                                                     | < 50         | < 50  | < 50    | 60   |
| organo-selenium                                                                                     | Ebselen                                                                        | < 50         | 95    | 96      | 93   |
| Pterins; Keto-Acids                                                                                 | Methotrexate/Amethopterin (R,S)                                                | < 50         | 82    | < 50    | 89   |
| Amino Acids                                                                                         | L-Glutamic acid, N-[4-[[[(2,4-diamino-6-pteridiny)methyl]methylamino]benzoyl]] | < 50         | 77    | 57      | 85   |
| Carbohydrates                                                                                       | Cytosine β-D-arabinofuranoside/Cytarabine                                      | < 50         | 93    | 98      | 84   |
| Macrocyclic lactone                                                                                 | Rapamycin                                                                      | < 50         | 62    | 51      | 67   |
| Salicylates and Derivatives; Benzene and Derivatives; Benzyl Esters; Benzylacetates; Methoxyphenols | Mycophenolic Acid                                                              | < 50         | 52    | < 50    | < 50 |
| Benzylisoquinolines                                                                                 | Cycloheximide                                                                  | < 50         | 74    | 81      | 77   |
|                                                                                                     | (+)-Tubocurarine chloride                                                      | < 50         | 51    | < 50    | < 50 |
|                                                                                                     | Atractyloside potassium salt                                                   | < 50         | 98    | 99      | 99   |
| Thienopyridines                                                                                     | Ticlopidine                                                                    | < 50         | < 50  | < 50    | 66   |
| Inhibitor of electron transfer at complex III                                                       | Antimycin A                                                                    | < 50         | 69    | < 50    | < 50 |
|                                                                                                     | Pyrvinium pamoate                                                              | < 50         | 98    | 96      | 84   |
| Pyridine derivatives/analogs                                                                        | Isoniazid                                                                      | < 50         | < 50  | < 50    | 56   |
|                                                                                                     | Trifluridine                                                                   | < 50         | 71    | < 50    | < 50 |
|                                                                                                     | Floxuridine                                                                    | < 50         | 92    | 56      | 68   |
| Purines and purine derivatives                                                                      | Azathioprine                                                                   | < 50         | < 50  | 52      | < 50 |
|                                                                                                     | Mercaptopurine                                                                 | < 50         | < 50  | 57      | < 50 |
|                                                                                                     | Thioguanosine                                                                  | < 50         | < 50  | 64      | 73   |
|                                                                                                     | Clofarabine                                                                    | < 50         | 99    | 98      | 93   |
|                                                                                                     | Cladribine                                                                     | < 50         | 99    | 89      | 87   |
|                                                                                                     | Azaguanine-8                                                                   | < 50         | < 50  | < 50    | 83   |
| Benzimidazoles                                                                                      | Cyclocytidine                                                                  | < 50         | 83    | 98      | 86   |
|                                                                                                     | Albendazole                                                                    | < 50         | 93    | 93      | 89   |
|                                                                                                     | Fenbendazole                                                                   | < 50         | 86    | 78      | 75   |
|                                                                                                     | Mebendazole                                                                    | < 50         | 95    | 96      | 94   |
|                                                                                                     | Flubendazole                                                                   | < 50         | 86    | 86      | 77   |
| Enzyme inhibitor                                                                                    | Oxibendazole                                                                   | < 50         | 80    | 84      | 64   |
|                                                                                                     | Oseltamivir                                                                    | < 50         | 95    | 98      | 95   |
|                                                                                                     | Disulfiram                                                                     | < 50         | 96    | 95      | 99   |
|                                                                                                     | Raltitrexed                                                                    | < 50         | 80    | 51      | 59   |
|                                                                                                     | Novobiocin sodium                                                              | < 50         | 51    | < 50    | 60   |
|                                                                                                     | Amorolfine                                                                     | < 50         | < 50  | < 50    | 56   |
|                                                                                                     | Camptothecine (S,+)                                                            | < 50         | 97    | 96      | 99   |
|                                                                                                     | AM 404                                                                         | < 50         | < 50  | < 50    | 65   |
| Etoposide                                                                                           | < 50                                                                           | 84           | 84    | < 50    |      |

**Table 3: *In vitro* validation of drug hits**

| Drugs                                   | IC <sub>50</sub> (μmol/L) |               |              |                 |              |               |              |              |              |
|-----------------------------------------|---------------------------|---------------|--------------|-----------------|--------------|---------------|--------------|--------------|--------------|
|                                         | A673                      | RD-ES         | SK-ES-1      | TC-71           | CHLA-258     | COG-E-352     | Hs 822.T     | Hs 863.T     | Hs 919.T     |
| Vindesine <sup>1</sup>                  | < 0.003                   | < 0.003       | < 0.003      | NR, < 0.003     | NR, < 0.003  | < 0.003       | 0.25 ± 0.01  | 0.28 ± 0.01  | 4.58 ± 0.45  |
| Elesclomol <sup>2</sup>                 | 0.006 ± 0.006             | 0.05 ± 0.06   | 0.01 ± 0.001 | < 0.003         | NR, < 0.003  | 0.007 ± 0.002 | > 20         | > 20         | > 20         |
| Niclosamide <sup>1</sup>                | 7.02 ± 1.23               | 8.54 ± 1.55   | 12.5 ± 2.36  | 0.79 ± 0.47     | 0.70 ± 0.14  | 0.42 ± 0.07   | 15.24 ± 3.51 | 10.45 ± 2.66 | 10.56 ± 2.84 |
| Sanguinarine <sup>2</sup>               | 0.75 ± 0.14               | 1.50 ± 0.12   | 1.87 ± 0.51  | 0.20 ± 0.08     | 0.95 ± 0.31  | 1.05 ± 0.18   | 1.55 ± 0.26  | 1.25 ± 0.14  | 1.44 ± 0.32  |
| Doxazosin <sup>2</sup>                  | 5.60 ± 1.52               | > 25          | 20.44 ± 5.87 | 22.5 ± 9.35     | 16.14 ± 6.78 | 17.12 ± 6.58  | 15.65 ± 2.12 | 14.58 ± 3.02 | 18.48 ± 3.27 |
| Fluphenzaine <sup>1</sup>               | 10.52 ± 2.89              | 14.26 ± 3.21  | 16.27 ± 3.66 | 17.00 ± 6.68    | 18.98 ± 6.79 | 16.14 ± 7.51  | 22.65 ± 7.23 | 20.54 ± 2.88 | 15.47 ± 3.68 |
| Menadione <sup>1</sup>                  | 6.80 ± 1.35               | 10.55 ± 3.20  | 5.56 ± 1.24  | 2.94 ± 3.48     | 3.64 ± 2.08  | 5.62 ± 1.31   | 12.20 ± 2.12 | 14.25 ± 3.20 | 15.82 ± 2.35 |
| Puromycin <sup>1</sup>                  | 0.25 ± 0.01               | 0.35 ± 0.03   | 0.35 ± 0.10  | 0.08 ± 0.05     | 0.06 ± 0.02  | 0.05 ± 0.01   | 0.55 ± 0.13  | 1.02 ± 0.26  | 0.89 ± 0.03  |
| Alfuzosin <sup>2</sup>                  | > 50                      | > 50          | > 50         | > 50            | > 50         | > 50          | > 50         | > 50         | > 50         |
| Daunorubicin <sup>2</sup>               | 0.05 ± 0.02               | 0.05 ± 0.03   | 0.04 ± 0.03  | 0.0046 ± 0.0004 | < 0.003      | < 0.003       | 0.15 ± 0.12  | 0.18 ± 0.08  | 0.42 ± 0.15  |
| MS275 <sup>1,2</sup>                    | 2.5 ± 1.02                | 2.0 ± 0.85    | 2.4 ± 1.01   | 1.53 ± 0.49     | 0.15 ± 0.03  | 1.47 ± 0.54   | > 25         | > 25         | > 50         |
| Simvastatin <sup>2</sup>                | 0.58 ± 0.05               | 3.25 ± 0.14   | 3.86 ± 0.89  | 4.33 ± 3.86     | 0.25 ± 0.13  | 10.47 ± 1.70  | 2.08 ± 0.84  | 4.10 ± 0.56  | 2.88 ± 0.58  |
| Auranofin <sup>2</sup>                  | 0.33 ± 0.22               | 2.45 ± 0.52   | 0.08 ± 0.32  | 0.26 ± 0.14     | 0.38 ± 0.19  | 0.82 ± 0.19   | 1.45 ± 0.09  | 3.25 ± 0.12  | 5.38 ± 0.89  |
| Fenbufen <sup>2</sup>                   | > 50                      | > 50          | > 50         | > 50            | > 50         | > 50          | > 50         | > 50         | > 50         |
| Lysergol <sup>2</sup>                   | > 50                      | > 50          | > 50         | > 50            | > 50         | > 50          | > 50         | > 50         | > 50         |
| Thioridazine <sup>1</sup>               | 10.05 ± 1.25              | 15.02 ± 1.45  | 15.86 ± 2.47 | 15.90 ± 1.38    | 16.06 ± 5.52 | 10.6 ± 4.37   | 8.50 ± 1.58  | 9.24 ± 2.01  | 8.84 ± 1.29  |
| Trifluoperazine <sup>1</sup>            | 15.60 ± 3.55              | 18.21 ± 2.54  | 16.68 ± 3.14 | 16.38 ± 3.46    | 13.63 ± 4.80 | 12.10 ± 1.58  | 10.55 ± 2.45 | 9.84 ± 2.28  | 16.82 ± 4.20 |
| (R)-Apomorphine <sup>2</sup>            | 8.52 ± 2.14               | 7.85 ± 1.69   | 10.55 ± 3.20 | 17.30 ± 2.21    | 14.67 ± 6.86 | 4.01 ± 1.55   | 14.32 ± 1.47 | 15.22 ± 2.19 | 16.68 ± 3.02 |
| Meclofenoxate <sup>2</sup>              | > 50                      | > 50          | > 50         | > 50            | > 50         | > 50          | > 50         | > 50         | > 50         |
| Chlorpromazine <sup>1</sup>             | 10.57 ± 2.15              | > 25          | > 25         | 17.61 ± 8.63    | 15.27 ± 4.55 | 16.14 ± 2.29  | 16.80 ± 3.22 | 18.40 ± 3.07 | 15.49 ± 2.09 |
| Tretinoin <sup>2</sup>                  | > 50                      | > 50          | > 50         | > 50            | 4.95 ± 3.82  | 35.54 ± 6.28  | > 50         | > 50         | > 50         |
| Kinetin <sup>2</sup>                    | > 50                      | > 50          | > 50         | > 50            | > 50         | > 50          | > 50         | > 50         | > 50         |
| Evoxine <sup>2</sup><br>(prestwick-665) | > 50                      | > 50          | > 50         | > 50            | > 50         | > 50          | > 50         | > 50         | > 50         |
| Primaquine <sup>2</sup>                 | 32.52 ± 6.58              | > 25          | > 25         | 14.28 ± 3.71    | 7.14 ± 2.21  | 13.33 ± 4.09  | > 25         | > 25         | > 50         |
| Progesterone <sup>2,3</sup>             | > 50                      | > 50          | > 50         | > 50            | 11.5 ± 5.31  | 24.88 ± 5.85  | > 50         | > 50         | > 50         |
| Anisomycin <sup>1</sup>                 | 0.12 ± 0.01               | 0.15 ± 0.02   | 0.20 ± 0.01  | 0.04 ± 0.01     | 0.08 ± 0.01  | 0.02 ± 0.01   | 0.15 ± 0.05  | 0.20 ± 0.01  | 0.15 ± 0.02  |
| Bortezomib <sup>4</sup>                 | 0.01 ± 0.003              | 0.01 ± 0.001  | 0.02 ± 0.002 | 0.005 ± 0.0081  | 0.007 ± 0.03 | 0.005 ± 0.04  | 0.45 ± 0.08  | 0.18 ± 0.03  | 0.17 ± 0.003 |
| Geldanamycin <sup>3</sup>               | 1.93 ± 0.05               | 0.05 ± 0.003  | 0.03 ± 0.002 | < 0.003         | < 0.003      | < 0.003       | > 20         | > 20         | > 20         |
| Genatespib <sup>4</sup>                 | 0.04 ± 0.01               | 0.02 ± 0.02   | 0.01 ± 0.001 | < 0.003         | < 0.003      | < 0.003       | > 20         | > 20         | > 20         |
| AUY922 <sup>4</sup>                     | 0.02 ± 0.002              | 0.009 ± 0.001 | 0.03 ± 0.002 | < 0.003         | < 0.003      | < 0.003       | > 20         | > 20         | > 20         |

The hits are annotated based on their source:

<sup>1</sup>Disease-based approach;

<sup>2</sup>siRNA-based approach;

<sup>3</sup>Resistance-based approach; or

<sup>4</sup>*In vitro*-based screen and others.

i.p. suspension dose of auranofin, the maximum tolerated dose was 16 mg/kg. This dose was reduced to 12 mg/kg and dose tolerance was evaluated after 5 daily doses of auranofin suspension i.p. to determine the effects of the accumulation of gold in the blood due to the slow elimination of gold. Based on the i.p. suspension dose tolerance studies, the auranofin suspension formulation and dose level of 12 mg/kg was selected for evaluation in xenograft mouse studies.

### Auranofin pharmacokinetics

The single-dose pharmacokinetics of auranofin following pre-treatment with i.v. ganetespib were characterized to describe systemic gold exposure near

the dose evaluated in EWS mouse xenograft studies. By describing blood gold concentrations *in vivo*, we are able to place the auranofin *in vitro* IC<sub>50</sub> values described in Table 3, as well as *in vivo* tumor response data in proper context.

As indicated previously, auranofin is a complex of gold triethylphosphine and thioglucose tetraacetate. Gold comprises 29% of auranofin by weight. Auranofin is chemically and metabolically highly unstable in solution. In our studies, auranofin immediately and completely dissociates in plasma and whole blood *ex vivo*, as well as simulated gastric fluid *in vitro* (unpublished results). Following oral administration of <sup>195</sup>Au auranofin to humans, 25% of administered <sup>195</sup>Au appears in plasma [19]. Further, approximately 40% of absorbed gold distributes into erythrocytes with 60% found in plasma [19]. As a result,

and consistent with the extensive literature describing auranofin pharmacokinetics in animals and humans, we characterized the pharmacokinetics of i.p. auranofin in mice by quantifying blood gold concentrations as summarized in Table 4. Peak blood gold concentrations were 12.43  $\mu\text{g}/\text{mL}$  in mice receiving auranofin suspension preceded by i.v. ganetespiib. The apparent elimination half-life of gold was 23.7 hours in mice pretreated with ganetespiib. The area under the blood gold concentration-time profile, another measure of systemic exposure to gold, was 535  $\text{hr} \cdot \mu\text{g}/\text{mL}$  in mice pretreated with ganetespiib. Following five consecutive once daily i.p. doses of 12 mg/kg auranofin suspension in mice pretreated with ganetespiib, the trough (plateau) plasma gold concentration (24 hours following the fifth daily dose) was 23.9  $\mu\text{g}/\text{mL}$ .

The mean single dose  $C_{\text{max}}$  value of 12.43  $\mu\text{g}/\text{mL}$ , expressed in molar concentration, equals to 63.10  $\mu\text{mol}/\text{L}$  (Table 4). The mean *in vitro*  $\text{IC}_{50}$  values for auranofin are described in Table 3, for each of the EWS cell lines tested, ranged from 0.08 to 5.38  $\mu\text{mol}/\text{L}$ .  $\text{IC}_{50}$  values for gold in these cell lines would be 29% of the values presented in Table 3. We conclude that systemic drug exposure to gold following 12 mg/kg ip auranofin suspension exceeded the *in vitro*  $\text{IC}_{50}$  values for auranofin, and for gold, in each of the EWS cell lines studied. In addition, blood gold concentrations achieved in the studies described in this

work exceed systemic drug exposure observed in adult and pediatric rheumatoid arthritis patients receiving therapeutic, chronic doses of auranofin [19, 20].

### Auranofin, ganetespiib, and the combination treatments improved survival of mice in a xenograft mouse model

To assess the antitumor activity of auranofin (using an alternative delivery approach), ganetespiib and the combination treatments *in vivo*, we generated a xenograft nude mouse model by injecting A673 cells intramuscularly proximal to the tibia. Based on the dose tolerance and pharmacokinetic studies described above, we administered auranofin at a tolerable daily i.p. dose that achieved adequate systemic drug exposure. Auranofin was administered with a dose of 12 mg/kg through an i.p. injection once a day for 5 days per week, and ganetespiib was administered with a dose of 150 mg/kg through an i.v. injection once weekly. Mice that grew palpable tumors were randomized into four groups: vehicle, auranofin-only, ganetespiib-only, and the combination. The weights of the mice were stable among all four arms throughout the study, and no major side effects were observed except for a skin lesion at the site of the i.v. injection at the base of the tail of 2 mice in the ganetespiib-only group. The H&E

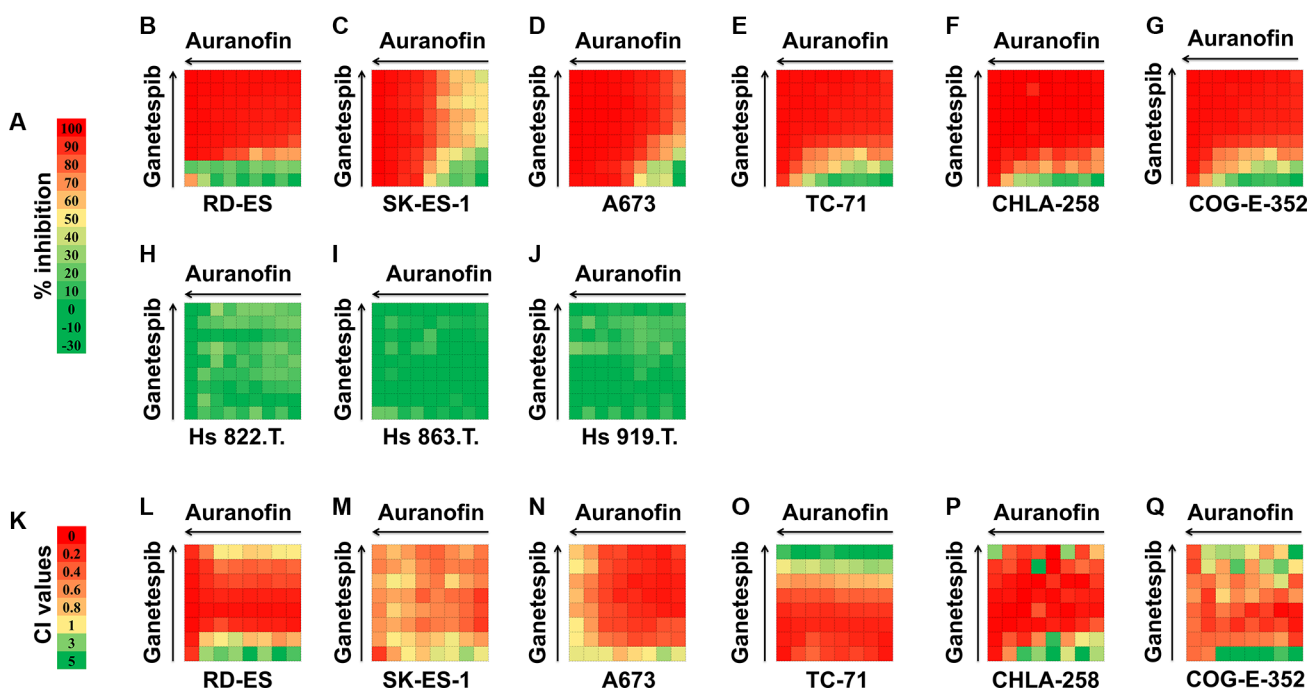

**Figure 2: Combination analysis for auranofin and ganetespiib in six EWS cell lines and three control (Hs 822.T., Hs 863.T., and Hs 919.T.) cell lines.** Inhibitory concentration values for individual auranofin or ganetespiib as well as drug combinations are shown. (A) Color scale for drug inhibition values. (B–J) Synergy between auranofin and ganetespiib was tested by CellTiter-Glo assay at 64 different drug combinations for each cell line. (K) Color scale for Combination Index (CI) values. (L–Q) CI values for auranofin and ganetespiib combination treatment for six EWS cell lines. CI value of  $> 1$  indicates antagonism effects; CI = 1 indicates additive effects; CI value of  $< 0.9$  indicates synergy effects; and CI value of  $< 0.5$  indicates strong synergy effects. (Negative inhibition values cannot be used to calculate CI values).

staining of kidney, liver and spleen tissues showed no sign of toxicity. The survival rates were significantly different between the auranofin only, ganetespib only, and the combination versus control groups ( $p < 0.05$ , confidence interval 90%). The survival rate in the combination group was nearly doubled in this extremely aggressive EWS tumor animal model when compared to the control group (Figure 3C).

## DISCUSSION

Historically, drug development for pediatric cancers has only occurred after agents have shown efficacy in adult tumors. Clofarabine (approved for refractory pediatric acute lymphoblastic leukemia) remains the only anti-neoplastic agent ever approved for pediatric use prior to adult labeling. Moreover, of the 120 new cancer therapeutic agents approved for adults by the year 2003, only 30 have had a pediatric indication. Of these 30 drugs, only 15 acquired subsequent pediatric labeling. These practices have led to limits in the new agents

“pipeline” for children and have hindered advancements in the treatment of EWS. In 2003, Hirschfeld *et al.* stated that the best opportunity for survival for patients with EWS was to identify more effective therapies to apply to newly diagnosed patients [21]. Sadly, more than ten years later, this remains true and underscores the need for the development of novel agents.

The Orphan Drug Act defines a rare disease as one that affects less than 200,000 individuals in the United States [22, 23]. Approximately 30 million people in the United States are living with rare diseases, equating to one in every ten Americans. Based on a recent study published by DiMasi *et al.* for the Study of Drug Development, costs to develop a new pharmaceutical agent is estimated to \$2870 million (2013 dollars) [24]. The Orphan Drug Act provides pharmaceutical companies with incentives to develop and commercialize new treatments for rare diseases. Despite these incentives; however, the development time and costs make it difficult for firms to invest in new therapies for diseases such as EWS. Drug repurposing, exploring new uses for existing (FDA

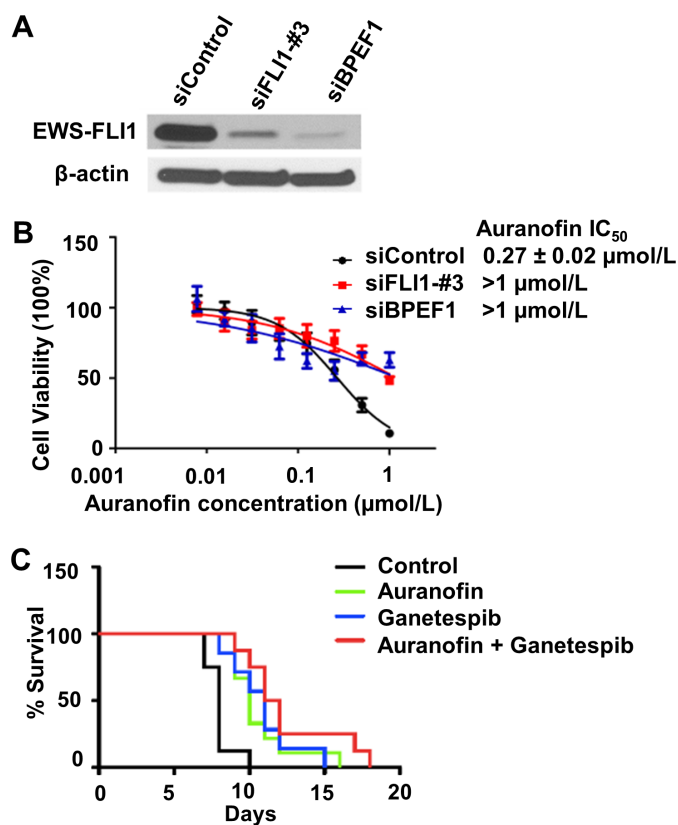

**Figure 3: The sensitivity of EWS cells to auranofin is dependent on expression of the *EWS-FLI1* oncogene.** (A) Representative western blot data shows the significant decrease in the expression of *EWS-FLI1* in A673 cells 48h post-transfection. (B) Cell viability was assessed by the CellTiter Blue assay in A673 cells treated by siControl, siFLI1-#3 or siBPEF1 for 48 h then followed by the incubation of auranofin ranging from 7.8 nmol/L to 1  $\mu\text{mol/L}$  for 72h. Data are presented as the mean  $\pm$  SD of three independent experiments performed in triplicate. (C) *In vivo* studies of auranofin, ganetespib and the combination treatment in an EWS xenograft mice model ( $n = 12$  per group). The percentage of survival rate in control, auranofin treated, ganetespib treated, and auranofin in combination with ganetespib treated groups.



approved) and abandoned drugs, represents an opportunity to advance new treatments to rare disease patients more quickly, and at a lower cost [25–27]. Over the past few years, biotech, academia, government and disease philanthropy organizations generated successful stories using innovative technologies for drug repurposing [28]. The National Center for Advancing Translational Sciences (NCATS) at the NIH also contributed tremendously to the growth in this translational science area. The Learning Collaborative, a partnership between the University of Kansas Cancer Center (KUCC), the Leukemia and Lymphoma Society (LLS) and the NIH's Therapeutics for Rare and Neglected Diseases (TRND) program, has played a leadership role nationally in this effort [27]. We have leveraged our drug repurposing expertise and experiences, along with an innovative *in silico* integrated bioinformatics platform technology (e.g., [13, 29, 30]), to not only identify drug repurposing opportunities in EWS, but to advance these agents administered alone and in combination with other anticancer agents through *in vitro* and *in vivo* preclinical proof of principle studies.

A systematic approach using *in silico* prediction combined with a traditional drug screening approach identified numerous drug repurposing opportunities. Molecular profiling data, critical to predicting drug activity *in silico*, is growing rapidly with increasing public access. Researchers are now able to combine genome-wide proteomics, gene expression profiles, and RNA interference data to build computational molecular pathology systems. These molecular pathology models can then be used to determine drug-disease connections using general molecular characteristics [29]. This systematic approach to repositioning drugs has now been applied to many diseases. Examples include topiramate for inflammatory bowel disease [30], trifluoperazine for lung cancer [31], and rapamycin for lymphoid malignancies [32]. By leveraging public datasets, we predicted 27 out of 1,335 drugs for *in vitro* validation. Fifteen out of 27 drugs exhibit  $IC_{50}$  values of less than 10  $\mu\text{mol/L}$  in one or more EWS cell lines and 10 drugs exhibit  $IC_{50}$  values less than 10  $\mu\text{mol/L}$  in all six EWS cell lines tested. Notably, 6 drugs (auranofin, geldanamycin, vindesine, elesclomol, daunorubicin, and MS-275) have  $IC_{50}$  values ten-fold less in EWS cell lines than in the three non-tumorigenic control cell lines. In addition to the high success rate of discovering new drug hits, *in silico* prediction is relatively inexpensive and quick, suggesting its great potential to screen compounds.

In addition to the drugs that are predicted to reverse the disease gene expression, we identified the drugs that share an expression profile similar to the silence of EWS/FLI1, a key causative factor in the pathogenesis of EWS, and the drugs that may overcome clinical drug resistance. Interestingly, the top 20 drug hits among the three approaches have little overlap, although some drugs may be significant in multiple approaches. For example,

geldanamycin, a drug predicted by the resistance-based approach, is also significant in both disease-based approach and siRNA-based approach, but it was ranked out of 20. All three approaches led to positive hits, which exhibit  $IC_{50}$  values less than 10  $\mu\text{mol/L}$  in EWS cell lines *in vitro*. These results suggested that *in silico* prediction based on different sources is beneficial. Especially, the recent efforts on molecular characterization of EWS and cellular response to drug treatment provide new opportunities to leverage diverse datasets for finding therapeutics for EWS [33–35].

Our *in vitro* drug screen identified 46 hits of drugs. These drugs were of diverse classes from alkylating agents, steroids, estrogens, and enzyme inhibitors, to gold compounds. We prioritized the top 29 hits from *in silico* and *in vitro* screening that were of potential clinical interest and then moved them forward for extensive *in vitro* validation (Table 3).

Among the six most potent drugs from our screens (i.e., auranofin, geldanamycin, vindesine, elesclomol, daunorubicin, and MS-275), MS-275 and elesclomol are the other two drugs that we are pursuing. MS-275 (also known as entinostat) is a selective histone deacetylase (HDAC) inhibitor which targets HDAC1 and HDAC3, and it has been demonstrated to be reasonably safe and effective in the treatment of a wide range of cancers, including leukemia, lymphoma, melanoma, non-small-cell lung cancer and breast cancer, both alone or in combination of other therapies [36–42]. Entinostat is currently marketed by Syndax and is in the phase III clinical trial in combination with exemestane for the treatment of patients with hormone receptor-positive advanced breast cancer (NCT02115282). Meanwhile, two active phase II clinical trials where non-small-cell-lung cancer patients will be treated with entinostat before chemotherapy (NCT01935947) and anti-PD1 treatment (NCT01928576) are ongoing, which indicates the feasibility of combination studies of entinostat with other targeted agents as an epigenetic-based therapy in EWS treatment. Elesclomol (STA-4783) is an investigational drug being developed by Synta Pharmaceuticals and GlaxoSmithKline, which exerts potent anticancer activity through the elevation of reactive oxygen species (ROS) levels and is currently in the phase II clinical evaluation as a novel anticancer therapeutic in combination with paclitaxel in the treatment of recurrent or persistent ovarian cancer (NCT00888615). In addition, the Genomics of Drug Sensitivity in Cancer (GDSC) database shows that cancer cells with *EWS-FLI1* mutations are preferentially sensitive to elesclomol as compare with the wide-type counterparts ([http://www.cancerrxgene.org/translation/Drug/1031#t\\_scatter\\_1031](http://www.cancerrxgene.org/translation/Drug/1031#t_scatter_1031)), which is consistent with our *in vitro* drug screens. Further mechanistic studies of entinostat and elesclomol in Ewing sarcoma are underway (Ma and Godwin, personal communications). In addition, the analogs of vindesine and daunorubicin, named vincristine and doxorubicin,

**Table 4: Blood gold pharmacokinetic parameters in BALB/c mice following a single i.p. dose of 12 mg/kg auranofin suspension following pre-treatment with ganetespib<sup>a</sup>**

| Treatment                           | Auranofin+Ganetespib |
|-------------------------------------|----------------------|
| Mean Body Weight (kg)               | 0.02026              |
| Auranofin Dose (mg/kg) <sup>b</sup> | 12                   |
| Gold Dose (mg/kg) <sup>c</sup>      | 3.48                 |
| C <sub>max</sub> (µg/mL)            | 12.43                |
| C <sub>max</sub> (µmol/L)           | 6.31                 |
| T <sub>max</sub> (hr)               | 8.0                  |
| AUC <sub>0-∞</sub> (µg*hr/mL)       | 536.26               |
| K <sub>el</sub> (hr <sup>-1</sup> ) | 0.029                |
| T <sub>1/2</sub> (hr)               | 23.7                 |
| Cl/F (mL/hr/kg)                     | 6.49                 |
| Trough (µg/mL) <sup>d</sup>         | 23.87                |

<sup>a</sup>N = 30, N = 3 per serial blood collection time point, ten serial blood samples collected over 48 hours.

<sup>b</sup>Auranofin injectable suspension formulation contained 0.67 mg/ml of auranofin and 0.5% HPMC K4M in D5W. Mice were pretreated with 150 mg/kg ganetespib i.v. approximately 24 hours prior to the administration of the single i.p. dose of auranofin.

<sup>c</sup>On a weight basis, auranofin contains 29% gold. Therefore, the i.p. dose of gold administered was 3.48 mg/kg.

<sup>d</sup>Trough sample was collected 24 hours following the fifth once daily i.p. dose.

respectively, are the first-line chemotherapies for EWS treatment, which further validates our *in silico* and *in vitro* screening approaches.

In these studies we were drawn to Auranofin (Ridaura<sup>®</sup>) since it was a hit in both *in silico* and *in vitro* screening. Auranofin is an oral gold complex, first approved by FDA for the treatment of rheumatoid arthritis in 1985 [43]. However, the mechanism of action of auranofin is not completely understood. In addition to its anti-inflammatory activity, others and we have reported that auranofin is a potent thioredoxin reductase (TrxR) inhibitor with both *in vitro* and *in vivo* anticancer activities [1, 25, 26, 44–54]. TrxR catalyzes the NADPH-dependent reduction of oxidized thioredoxin and plays a central role in regulating cellular redox homeostasis, cell growth, and apoptosis. Increasing evidence shows that TrxR is over-expressed or constitutively active in many tumor cells. Moreover, TrxR appears to contribute to increased tumor cell growth and a resistance to chemotherapy. Others have proposed that auranofin might be a selective inhibitor of the oncogenic protein kinase C iota (PKC $\iota$ ) protein [55], but others have yet to confirm.

As previously reported, Ridaura<sup>®</sup> was first developed for the management of rheumatoid arthritis as a disease-modifying anti-rheumatic drug (DMARD) [56]. However, the adverse effects and the concerns about the long-term consequences of the immunosuppression induced by Ridaura<sup>®</sup> led to the decline in its use [57]. Although, auranofin has shown superior activity in *in vitro* screens across several tumor types [49, 58–61], we noted that it was not effective in other animal xenograft

models by our group when given orally (Ma, Pessetto, and Godwin, unpublished data). The only *in vivo* efficacy studies using auranofin that showed activity evaluate the drug as a suspension/solution delivered i.p. [58, 62], but neither studies performed formulations, dose tolerance, or pharmacokinetics studies. Therefore, we sought to determine if altering the route of delivery could replicate the dramatic *in vitro* anticancer activity and improve its efficacy *in vivo*. Previous studies have shown that orally delivered auranofin is rapidly metabolized and intact auranofin has never been detected in the blood [63]. Thus, studies of the pharmacokinetics of auranofin have involved measurement of gold concentrations. Upon oral administration, 25% of auranofin gets absorbed [18, 64]. The mean terminal plasma half-life of auranofin gold at steady state in previous studies was 26 days (range 21 to 31 days; n = 5). The mean terminal body half-life was 80 days (range 42 to 128; n = 5). About 60% of the absorbed gold (15% of the administered dose) from a single dose of auranofin is excreted in urine; the remaining gold is excreted in feces [18]. To more closely mimic the *in vitro* activity of auranofin, we evaluated alternative routes of delivery and demonstrated that the amount of gold from the i.p. suspension dose is 4 to 5 times that obtained by the oral route.

Auranofin has been evaluated in the several cancer clinical trials (clinicaltrials.gov). A clinical proof of concept trial, evaluating auranofin as a single agent for the treatment of chronic lymphocytic leukemia (CLL) was recently completed (clinicaltrials.gov, NCT01419691) by University of Kansas Medical Center. Based on the initial

results in CLL, a multi-center clinical proof of concept trial is currently being initiated to evaluate auranofin in combination with bortezomib for the treatment of Mantle Cell Lymphoma (Weir, personal communications). In a recent clinical study, Jatoi and colleagues reported that 10 asymptomatic ovarian cancer patients with elevated CA-125 received 3 mg of auranofin orally twice per day and were evaluated for up to ~6 months. Although well tolerated, oral delivery of auranofin had little effect or no effect on improving progress-free survival; the median PFS was 2.8 months (95% CI: 1.3–3.8) [65], further suggesting our idea that the gold levels obtained via oral delivery may be insufficient to achieve its optimal anti-cancer effects.

The other class of drugs identified in our study is HSP90 inhibitors. HSP90 is a highly conserved molecular chaperone protein that aids in the stability and proper folding of client proteins. It is vital for cell transformation, proliferation, and survival. Client proteins that are dependent on HSP90 were identified in cancer hallmarks such as growth and evasion of apoptosis. Thus, HSP90 is considered as a potential target for cancer therapy [66, 67]. Our validation screen identified three HSP90 inhibitors: geldanamycin, ganetespib, and AUY922. Geldanamycin, a benzoquinone ansamycin with antibiotic and antitumor activities, was one of earliest HSP90 inhibitors [68, 69]. The dependence on NAD(P)H:quinone oxidoreductase and the gastrointestinal and hepatic toxicities limited geldanamycin and its derivatives' clinical use. Ganetespib and AUY922 emerged as second-generation, non-geldanamycin HSP90 inhibitors with better pharmacokinetics and safety profiles [70, 71]. Ganetespib inhibits HSP90 protein by acting on the ATP-binding domain at the N-terminus and has shown a preclinical antitumor activity in several solid and hematological tumors [17, 67, 68, 72, 73]. AUY922 is an isoxazole-based HSP90 inhibitor that antagonizes the ATPase activity of the protein. It has shown *in vitro* and *in vivo* potent antitumor activity [72, 73]. Thirty eight studies found for ganetespib on ClinicalTrials.gov. Two trials were terminated with results as of July 20, 2016 (NCT01798485 and NCT01227018).

Even though the NCT01798485 trial showed no safety issues with ganetespib, Synta suspended the phase 3 study of ganetespib in combination with docetaxel versus docetaxel alone in patients with advanced non-small-cell lung cancer. NCT01227018, a phase 2 study STA-9090 as second or third-line therapy for metastatic pancreas cancer, was terminated due to interim analysis found the study drug to be ineffective (15 patients were enrolled). Three trials are recruiting patients with small cell lung cancer, epithelial ovarian cancer, fallopian tube cancer, primary peritoneal cancer, and breast cancer.

In the *in vivo* study, auranofin via i.p. delivery, ganetespib, and the combination treatments significantly increased the survival rate of the mice. The new route

of delivery of auranofin alone or in combination with ganetespib did not show any noticeable toxicity or adverse effects, except for a tail lesion in two mice at the site of the i.v. injection of ganetespib. In all, auranofin, an FDA-approved drug for the oral treatment of rheumatoid arthritis, and ganetespib, an investigational HSP90 inhibitor, were predicted to have activity in EWS. Activity was subsequently confirmed *in vitro* via primary and secondary screens. *In vivo* proof of principle was demonstrated in a validated xenograft mouse model of EWS. When given in combination, auranofin and ganetespib were synergistic; however, reformulation of auranofin was required to achieve anti-cancer levels of the gold particle, suggesting caution when repurposing certain drugs for cancer therapies, *i.e.*, the potential need to “repurpose” the formulation and delivery of a repurposed drug for cancer therapy. Efforts are underway to translate these findings to a clinical proof of concept study in EWS patients with this debilitating and often-fatal disease.

## MATERIALS AND METHODS

### Compound library

The FDA-approved drug library was provided by the Lead Development and Optimization Shared Resource (LDOSR) within the NCI Cancer Center at the University of Kansas. The library contains 2,316 FDA-approved drugs (1,536 unique chemical entities) with known bioavailability and safety profile in humans. Drugs were present at a concentration of 10 mmol/L in DMSO. For validation, auranofin was synthesized at the University of Kansas and provided by LDOSR with a purity of 100%. Ganetespib was gifted by Synta Pharmaceuticals (Dr. David Proia). Other drugs were purchased from SelleckChem.

### Cell culture

The A673 cell line, an EWS cell line [74], was kindly provided by Dr. Mizuki Azuma (University of Kansas, Lawrence, KS). A673 cells were cultured in Dulbecco's modified Eagle's medium supplemented with 2 mM L-glutamine and 10% fetal bovine serum (FBS). TC-71, COG-E-352 and CHLA-258 cell lines were obtained from Children's Oncology Group Cell Culture and the Xenograft Repository (Texas Tech University Health Sciences Center, TX). TC-71, COG-E-352, and CHLA-258 cell lines were maintained in Iscove's Modified Dulbecco's Medium supplemented with 20% FBS, 2 mM L-glutamine and IXITS (American Type Culture Collection, ATCC, Manassas, VA). RD-ES (cultured in RPMI-1640 medium with 15% FBS), SK-ES-1 (cultured in McCoy's 5A medium with 10% FBS) cell lines were purchased from ATCC. Hs 822.T and Hs 863.T (both purported to be derived from EWS), and Hs 919.T

(derived from an osteoid tumor) were also purchased from ATCC and were cultured in Dulbecco's Modified Eagle's Medium with 10% FBS. All cell lines were supplemented with 1% penicillin/streptomycin and were maintained in a 5% CO<sub>2</sub> atmosphere at 37°C. The EWS fusion status of each cell line is shown below (Table 1).

### ***In silico* prediction**

Three *in silico* approaches (disease-based, siRNA-based, resistance-based approach) were used to predict drugs for EWS. The workflow is shown in Figure 1 and the details of the methods are described in the supplementary material. Briefly, first, the drugs that are predicted to reverse disease gene expression were identified. The disease gene expression signature was created as the overlap of the signatures from two meta-analysis studies [75, 76]. Next, since the EWSR1/FLI1 fusion gene is thought to be a causative mutation in most EWS, we searched for drugs that possess the gene expression profile similar to the silence of EWS/FLI1. The siRNA of EWS/FLI1 (siEWS/FLI1) mediated signature was obtained from the previous study [77]. Lastly, since a large number of EWS patients are resistant to chemotherapy, we searched for drugs that were predicted to sensitize drug resistance. The drug resistance signature was computed by comparing the pre-treatment samples of patients responding to chemotherapy and those responding poorly to chemotherapy [78]. Drug expression signature database was built from the Connectivity Map (CMap) [79] and part of the Library of Integrated Cellular Signatures (LINCS, <http://lincscloud.org>). The drug signatures that are not robust across multiple experiments were removed. The comparison of disease signatures and drug signatures was described previously [13]. The negative score shows the drug signature is anti-correlated with the disease signature and the positive score shows the drug signature is correlated with the disease signature. A false discovery rate (FDR) value of less than 0.05 was used to select hits and only the top 20 hits in each approach were selected for *in vitro* validation. The drug hits predicted from the three approaches were merged. We further manually selected drugs for *in vitro* validation based on their availability in the *in vitro* screening library, novelty and potential side effects.

### ***In vitro* high-throughput screening**

Drugs or vehicle (DMSO) were preloaded by the LDOSR as 250 nL aliquots on an Echo550 platform to each well to give a final concentration of 1 µmol/L in a total of 25 µL. Cells were grown to 80–90% confluence, harvested and aliquoted into 384-well plates (black µClear microplates, Greiner bio-one, Germany) at concentrations of 750–1,500 cells per well in a total volume of 25 µl/well using a Matrix Wellmate (Thermo Scientific). Cells were cultured for 72 hours in a 5% CO<sub>2</sub> atmosphere at 37°C.

Aliquots of 25 µl CellTiter-Glo® Reagent (Promega) were added directly to each well, the plates were incubated at room temperature for 20 min and the luminescence signal was measured according to the manufacturer's protocol. The measurements were made using Infinite® M200 Pro plate reader (Tecan, Switzerland). Performance of the assay was calculated and the Z' factors were ≥ 0.5 [80]. Data were normalized to percentage inhibition. Samples exhibiting > 50% growth inhibition in the presence of 1 µmol/L drug were classified as positive hits.

### **Hits validation and combination study**

For hits validation and combination study, cells were harvested and aliquoted into 384-well plates at concentrations of 750–1,500 cells per well in a total of 20 µl/well using a Matrix Wellmate (Thermo Scientific). Five µl of culture media containing either vehicles or drug were added to each well the next day (drug concentrations range from 1 nmol/L to 50 µmol/L). For combination study, selected drugs were archived in robotically accessible plates, to which media was added in preparation for addition to master plates by a Nimbus 96 liquid-dispensing workstation (Hamilton). Liquid transfers to dilution and assay plates were handled using the same workstation. Each 384-well master plate contained four 9 by 9 dose-matrix blocks, with eight serial two-fold dilutions (concentrations range from 7.8 nmol/L to 1 µmol/L). Additional wells were reserved for untreated, and vehicle-treated control wells. Cell proliferation was evaluated using Cell-Titer Glo® reagents (Promega). IC<sub>50</sub> values were determined for each drug using SigmaPlot (Systat Software). The combination index values were calculated using SigmaPlot (Systat Software) and CompuSyn [25, 81–83].

### **Auranofin and ganetespib formulations**

A parenteral suspension formulation was prepared to support IP administration of auranofin in EWS mouse xenograft studies. The injectable suspension formulation contained 0.67 mg/ml of auranofin with 0.5% Hydroxypropyl methylcellulose (HPMC, viscosity grade K4M) in 5% dextrose in water for injection (D5W). Ganetespib was administered using an injectable solution formulation (20% Cremophor RH40 and 80% D5W) provided by Synta Pharmaceuticals.

### **Auranofin dose tolerance studies**

The auranofin dose tolerance and pharmacokinetics study protocols were approved by the KU-Lawrence Institutional Animal Care and Use Committee (KU-IACUC). Subchronic dose tolerance studies were conducted in BALB/c mice to support the design of EWS mouse xenograft studies. By establishing the Maximum

Tolerated Dose (MTD), we defined the upper limit of doses selected for EWS mouse xenograft and *in vivo* pharmacokinetics studies. Mice received a single dose of auranofin solution and suspension administered by i.v. and i.p. routes of administration. Following a starting dose of 1 mg/kg, doses were escalated in subsequent mice until intolerable drug-related adverse effects were observed. MTD was defined as the maximum dose that was not associated dose-limiting adverse effects in mice. The MTD was confirmed in a group of 3 mice. Mice were continuously monitored for up to 4 hours post-dose.

### Auranofin pharmacokinetics

The single-dose plasma pharmacokinetics of gold were characterized in 36 BALB/c mice following administration of a single 12 mg/kg i.p. suspension dose of auranofin. The mice were pretreated 24 hours prior to auranofin, with a single 150 mg/kg i.v. dose of ganetespib. Blood samples for determination of blood gold concentration were obtained prior to, and at 5, 15, 30 and 60 minutes, 2, 4, 8, 12, 24 and 48 hours following administration of auranofin. In addition, a trough (plateau) blood sample, collected at 24 hours post-dose, was obtained in mice following the fifth of five consecutive 12 mg/kg once daily i.p. doses of auranofin suspension. Blood samples were collected from each animal via cardiac puncture. Whole blood aliquots of 500  $\mu$ L obtained from each of the three animals per time point were assayed using a validated inductively coupled plasma mass spectrometry (ICPMS) method to quantify blood gold concentration. Mean blood gold concentrations were determined for each blood collection time point. Non-parametric pharmacokinetic data analysis was performed on the resultant mean blood gold concentration-time data using WinNonLin<sup>®</sup>, Version 6.2 (Centara USA, Inc, St. Louis, MO).

### *In vivo* xenograft mouse model

The guidelines adopted by the Institutional Animal Care and Use Committee of the University of Kansas Medical Center (KUMC-IACUC) were followed in all performed procedures. All experimental protocols were approved by KUMC-IACUC. Homozygous athymic nude (Foxn1nu/Foxn1nu) female mice at the age of 4-weeks were purchased from Jackson Laboratories. After one week, one million A673 cells in PBS (pH = 7.3) were injected into mice. The cells were injected intramuscularly proximal to the tibia and treatment started after 15 days of inoculation. Mice developing palpable tumors were divided into 4 arms and treated for up to 18 days: vehicle (20% Cremophor RH40 and 80% D5W iv and 0.5% HPMC K4M ip), auranofin (12 mg/kg i.p. injection 5 days per week), ganetespib (150 mg/kg i.v. injection once weekly), as well as auranofin and ganetespib combined. Mice were evaluated for overall health and weighed every

week. When tumor size impeded mobility, mice were sacrificed and necropsies were performed. Tumors were then dissected, measured and processed for analysis. The liver, kidneys, and spleen were also snap frozen in liquid nitrogen or fixed in 10% neutral buffered formalin and paraffin embedded for toxicity studies. Tissues were then subjected to hematoxylin and eosin (H&E) staining and immunohistochemical staining. The immunohistochemical staining method and antibodies used in the study were listed in the supplementary data.

### Data analysis and statistics

*In vitro* data were reported as mean  $\pm$  SD of 3 independent experiments. In the statistical analyses for the *in vivo* xenograft study, Kaplan-Meier survival curves were used to determine the difference in survival among the treatment groups. A *p*-value less than 0.05 was considered as statistically significant. All statistical analyses were performed using SigmaPlot 12.3 (Systat Software, Inc. CA, USE).

### ACKNOWLEDGMENTS AND FUNDING

This work was supported in part by grants from the NCI (R01 CA106588; to A.K. Godwin), the NIH (UL1 TR000001-02S1; to S.J. Weir and A.K. Godwin; R01 GM079719 to A.J. Butte), the KU Cancer Center Support Grant (P30 CA168524), and a CTSA grant from NCATS awarded to Z.Y. Pessetto through the University of Kansas Medical Center for Frontiers: The Heartland Institute for Clinical and Translational Research # KL2TR000119. This work was also supported by a MCA Partners Advisory Board grant from Children's Mercy Hospital (CMH) and The University of Kansas Cancer Center (KUCC). The contents are solely the responsibility of the authors and do not necessarily represent the official views of the NIH, NCATS, NCI, or NIGMS. We would like to thank the KUCC's Lead Development and Optimization Shared Resource (LDOSR) for providing the drug library and technical support and a member of the KUCC's Biospecimen Repository Core Facility staff, Tara Meyer, for her support in H&E and immunohistochemical staining experiments. The authors would also like to acknowledge support from the Kansas Bioscience Authority Eminent Scholar Program to A.K. Godwin, the Ewing Marion Kauffman Foundation, University of Kansas Endowment Association, the Braden's Hope Foundation, and the Massman Family Foundation. Dr. Godwin is the Chancellors Distinguished Chair in Biomedical Sciences endowment at KUMC.

### CONFLICTS OF INTEREST

All authors claim there is no conflicts of interest.

## Authors' contributions

AKG, ZYP, SJW, AJB, BC, and KAN conceived and designed the experiments. ZYP, BC, HA, MB, SJW, YM, HGR and AKG wrote the main manuscript text. ZYP prepared Figures 2 and S1–S11, Tables 2–3 and S1. ZYP, HA, SH and YM prepared Figure 3. BC prepared Figure 1. CAF and MB prepared Tables 4 and S2. HA prepared table 1. All authors reviewed the manuscript.

## REFERENCES

1. Ross KA, Smyth NA, Murawski CD, Kennedy JG. The biology of ewing sarcoma. *ISRN Oncol.* 2013; 2013: 759725. doi:10.1155/2013/759725.
2. Ordonez JL, Osuna D, Herrero D, de Alava E, Madoz-Gurpide J. Advances in Ewing's sarcoma research: where are we now and what lies ahead? *Cancer Res.* 2009; 69:7140–50. doi:10.1158/0008-5472.CAN-08-4041.
3. Rodriguez-Galindo C, Navid F, Liu T, Billups CA, Rao BN, Krasin MJ. Prognostic factors for local and distant control in Ewing sarcoma family of tumors. *Ann Oncol.* 2008; 19:814–20. doi:10.1093/annonc/mdm521.
4. Pinkerton CR, Bataillard A, Guillo S, Oberlin O, Fervers B, Philip T. Treatment strategies for metastatic Ewing's sarcoma. *Eur J Cancer.* 2001; 37:1338–44. doi:
5. Rodriguez-Galindo C, Liu T, Krasin MJ, Wu J, Billups CA, Daw NC, Spunt SL, Rao BN, Santana VM, Navid F. Analysis of prognostic factors in ewing sarcoma family of tumors: review of St. Jude Children's Research Hospital studies. *Cancer.* 2007; 110:375–84. doi:10.1002/cncr.22821.
6. Esiashvili N, Goodman M, Marcus RB, Jr. Changes in incidence and survival of Ewing sarcoma patients over the past 3 decades: Surveillance Epidemiology and End Results data. *J Pediatr Hematol Oncol.* 2008; 30:425–30. doi:10.1097/MPH.0b013e31816e22f3.
7. Chaturvedi A, Hoffman LM, Welm AL, Lessnick SL, Beckerle MC. The EWS/FLI Oncogene Drives Changes in Cellular Morphology, Adhesion, and Migration in Ewing Sarcoma. *Genes Cancer.* 2012; 3:102–16. doi:10.1177/1947601912457024.
8. Sankar S, Lessnick SL. Promiscuous partnerships in Ewing's sarcoma. *Cancer Genet.* 2011; 204:351–65. doi:10.1016/j.cancergen.2011.07.008.
9. Jedlicka P. Ewing Sarcoma, an enigmatic malignancy of likely progenitor cell origin, driven by transcription factor oncogenic fusions. *Int J Clin Exp Pathol.* 2010; 3:338–47. doi:
10. Ahmed AA, Zia H, Wagner L. Therapy resistance mechanisms in Ewing's sarcoma family tumors. *Cancer Chemother Pharmacol.* 2014; 73:657–63. doi:10.1007/s00280-014-2392-1.
11. Womer RB, West DC, Krailo MD, Dickman PS, Pawel BR, Grier HE, Marcus K, Sailer S, Healey JH, Dormans JP, Weiss AR. Randomized controlled trial of interval-compressed chemotherapy for the treatment of localized Ewing sarcoma: a report from the Children's Oncology Group. *J Clin Oncol.* 2012; 30:4148–54. doi:10.1200/JCO.2011.41.5703.
12. Balamuth NJ, Womer RB. Ewing's sarcoma. *Lancet Oncol.* 2010; 11:184–92. doi:10.1016/S1470-2045(09)70286-4.
13. Sirota M, Dudley JT, Kim J, Chiang AP, Morgan AA, Sweet-Cordero A, Sage J, Butte AJ. Discovery and preclinical validation of drug indications using compendia of public gene expression data. *Sci Transl Med.* 2011; 3: 96ra77. doi:10.1126/scitranslmed.3001318.
14. Vicent S, Sayles LC, Vaka D, Khatri P, Gevaert O, Chen R, Zheng Y, Gillespie AK, Clarke N, Xu Y, Shrager J, Hoang CD, Plevritis S, et al. Cross-species functional analysis of cancer-associated fibroblasts identifies a critical role for CLCF1 and IL-6 in non-small cell lung cancer *in vivo*. *Cancer Res.* 2012; 72:5744–56. doi:10.1158/0008-5472.can-12-1097.
15. Giovannini M, Biegel JA, Serra M, Wang JY, Wei YH, Nycum L, Emanuel BS, Evans GA. EWS-erg and EWS-Flil fusion transcripts in Ewing's sarcoma and primitive neuroectodermal tumors with variant translocations. *J Clin Invest.* 1994; 94:489–96. doi:10.1172/JCI117360.
16. Teicher BA, Bagley RG, Rouleau C, Kruger A, Ren Y, Kurtzberg L. Characteristics of human Ewing/PNET sarcoma models. *Ann Saudi Med.* 2011; 31:174–82. doi:10.4103/0256-4947.78206.
17. Neckers L, Workman P. Hsp90 molecular chaperone inhibitors: are we there yet? *Clin Cancer Res.* 2012; 18:64–76. doi:10.1158/1078-0432.ccr-11-1000.
18. Inc. PL. RIDAURA® (auranofin) Capsules. 2011. (See Supplementary Material Reference 18).
19. Inc. XP. RIDAURA® Auranofin Capsules 3 mg product monograph. Retrieved from [http://www.xediton.com/RIDAURA\\_PRODUCT%20MONOGRAPH.pdf](http://www.xediton.com/RIDAURA_PRODUCT%20MONOGRAPH.pdf). 2010. doi:
20. Giannini EH, Brewer EJ, Person DA. Blood gold concentrations in children with juvenile rheumatoid arthritis undergoing long-term oral gold therapy. *Ann Rheum Dis.* 1984; 43:228–31. doi:
21. Hirschfeld S, Ho PT, Smith M, Pazdur R. Regulatory approvals of pediatric oncology drugs: previous experience and new initiatives. *J Clin Oncol.* 2003; 21:1066–73. doi:10.1200/JCO.2003.11.138.
22. Melnikova I. Rare diseases and orphan drugs. *Nat Rev Drug Discov.* 2012; 11:267–8. doi:10.1038/nrd3654.
23. (2013). Orphan Drug Act. In: FDA, ed. 21.
24. DiMasi JA, Grabowski HG, Hansen RW. Innovation in the pharmaceutical industry: New estimates of R&D costs.
25. Passetto ZY, Ma Y, Hirst JJ, von Mehren M, Weir SJ, Godwin AK. Drug repurposing identifies a synergistic combination therapy with imatinib mesylate for gastrointestinal stromal tumor. *Mol Cancer Ther.* 2014; 13:2276–87. doi:10.1158/1535-7163.mct-14-0043.

26. Pessetto ZY, Weir SJ, Sethi G, Broward MA, Godwin AK. Drug repurposing for gastrointestinal stromal tumor. *Mol Cancer Ther.* 2013; 12:1299–309. doi:10.1158/1535-7163.MCT-12-0968.
27. Weir SJ, DeGennaro LJ, Austin CP. Repurposing approved and abandoned drugs for the treatment and prevention of cancer through public-private partnership. *Cancer Res.* 2012; 72:1055–8. doi:10.1158/0008-5472.can-11-3439.
28. Lipton SA, Nordstedt C. Partnering with Big Pharma-What Academics Need to Know.
29. Dudley JT, Schadt E, Sirota M, Butte AJ, Ashley E. Drug discovery in a multidimensional world: systems, patterns, and networks. *J Cardiovasc Transl Res.* 2010; 3:438–47. doi:10.1007/s12265-010-9214-6.
30. Dudley JT, Sirota M, Shenoy M, Pai RK, Roedder S, Chiang AP, Morgan AA, Sarwal MM, Pasricha PJ, Butte AJ. Computational repositioning of the anticonvulsant topiramate for inflammatory bowel disease. *Sci Transl Med.* 2011; 3: 96ra76. doi:10.1126/scitranslmed.3002648.
31. Yeh CT, Wu AT, Chang PM, Chen KY, Yang CN, Yang SC, Ho CC, Chen CC, Kuo YL, Lee PY, Liu YW, Yen CC, Hsiao M, et al. Trifluoperazine, an antipsychotic agent, inhibits cancer stem cell growth and overcomes drug resistance of lung cancer. *Am J Respir Crit Care Med.* 2012; 186:1180–8. doi:10.1164/rccm.201207-1180OC.
32. Wei G, Twomey D, Lamb J, Schlis K, Agarwal J, Stam RW, Opferman JT, Sallan SE, den Boer ML, Pieters R, Golub TR, Armstrong SA. Gene expression-based chemical genomics identifies rapamycin as a modulator of MCL1 and glucocorticoid resistance. *Cancer Cell.* 2006; 10:331–42. doi:10.1016/j.ccr.2006.09.006.
33. Tirode F, Surdez D, Ma X, Parker M, Le Deley MC, Bahrami A, Zhang Z, Lapouble E, Grossetete-Lalami S, Rusch M, Reynaud S, Rio-Frio T, Hedlund E, et al. Genomic landscape of Ewing sarcoma defines an aggressive subtype with co-association of STAG2 and TP53 mutations. *Cancer Discov.* 2014; 4:1342–53. doi:10.1158/2159-8290.CD-14-0622.
34. Crompton BD, Stewart C, Taylor-Weiner A, Alexe G, Kurek KC, Calicchio ML, Kiezun A, Carter SL, Shukla SA, Mehta SS, Thorner AR, de Torres C, Lavarino C, et al. The genomic landscape of pediatric Ewing sarcoma. *Cancer Discov.* 2014; 4:1326–41. doi:10.1158/2159-8290.CD-13-1037.
35. Brohl AS, Solomon DA, Chang W, Wang J, Song Y, Sindiri S, Patidar R, Hurd L, Chen L, Shern JF, Liao H, Wen X, Gerard J, et al. The genomic landscape of the Ewing Sarcoma family of tumors reveals recurrent STAG2 mutation. *PLoS Genet.* 2014; 10: e1004475. doi:10.1371/journal.pgen.1004475.
36. Gojo I, Jiemjit A, Trepel JB, Sparreboom A, Figg WD, Rollins S, Tidwell ML, Greer J, Chung EJ, Lee MJ, Gore SD, Sausville EA, Zwiebel J, et al. Phase I and pharmacologic study of MS-275, a histone deacetylase inhibitor, in adults with refractory and relapsed acute leukemias. *Blood.* 2007; 109:2781–90. doi:10.1182/blood-2006-05-021873.
37. Kummar S, Gutierrez M, Gardner ER, Donovan E, Hwang K, Chung EJ, Lee MJ, Maynard K, Kalnitskiy M, Chen A, Melillo G, Ryan QC, Conley B, et al. Phase I trial of MS-275, a histone deacetylase inhibitor, administered weekly in refractory solid tumors and lymphoid malignancies. *Clin Cancer Res.* 2007; 13:5411–7. doi:10.1158/1078-0432.CCR-07-0791.
38. Gore L, Rothenberg ML, O'Bryant CL, Schultz MK, Sandler AB, Coffin D, McCoy C, Schott A, Scholz C, Eckhardt SG. A phase I and pharmacokinetic study of the oral histone deacetylase inhibitor, MS-275, in patients with refractory solid tumors and lymphomas. *Clin Cancer Res.* 2008; 14:4517–25. doi:10.1158/1078-0432.CCR-07-1461.
39. Hauschild A, Trefzer U, Garbe C, Kaehler KC, Ugurel S, Kiecker F, Eigentler T, Krissel H, Schott A, Schadendorf D. Multicenter phase II trial of the histone deacetylase inhibitor pyridylmethyl-N-{4-[(2-aminophenyl)-carbamoyl]-benzyl}-carbamate in pretreated metastatic melanoma. *Melanoma Res.* 2008; 18:274–8. doi:10.1097/CMR.0b013e328307c248.
40. Pili R, Salumbides B, Zhao M, Altiok S, Qian D, Zwiebel J, Carducci MA, Rudek MA. Phase I study of the histone deacetylase inhibitor entinostat in combination with 13-cis retinoic acid in patients with solid tumours. *Br J Cancer.* 2012; 106:77–84. doi:10.1038/bjc.2011.527.
41. Juergens RA, Wrangle J, Vendetti FP, Murphy SC, Zhao M, Coleman B, Sebree R, Rodgers K, Hooker CM, Franco N, Lee B, Tsai S, Delgado IE, et al. Combination epigenetic therapy has efficacy in patients with refractory advanced non-small cell lung cancer. *Cancer Discov.* 2011; 1:598–607. doi:10.1158/2159-8290.CD-11-0214.
42. Yardley DA, Ismail-Khan RR, Melichar B, Lichinitser M, Munster PN, Klein PM, Cruickshank S, Miller KD, Lee MJ, Trepel JB. Randomized phase II, double-blind, placebo-controlled study of exemestane with or without entinostat in postmenopausal women with locally recurrent or metastatic estrogen receptor-positive breast cancer progressing on treatment with a nonsteroidal aromatase inhibitor. *J Clin Oncol.* 2013; 31:2128–35. doi:10.1200/JCO.2012.43.7251.
43. Chen X, Shi X, Wang X, Liu J. Novel use of old drug: Anti-rheumatic agent auranofin overcomes imatinib-resistance of chronic myeloid leukemia cells. *Cancer Cell Microenviron.* 2014; 1. doi:10.14800/ccm.415.
44. Chen X, Shi X, Zhao C, Li X, Lan X, Liu S, Huang H, Liu N, Liao S, Zang D, Song W, Liu Q, Carter BZ, et al. Anti-rheumatic agent auranofin induced apoptosis in chronic myeloid leukemia cells resistant to imatinib through both Bcr/Abl-dependent and -independent mechanisms. *Oncotarget.* 2014; 5:9118–32. doi: 10.18632/oncotarget.2361.
45. Madeira JM, Bajwa E, Stuart MJ, Hashioka S, Klegeris A. Gold drug auranofin could reduce neuroinflammation by inhibiting microglia cytotoxic secretions and primed respiratory burst. *J Neuroimmunol.* 2014. doi:10.1016/j.jneuroim.2014.08.615.

46. Cox AG, Brown KK, Arner ES, Hampton MB. The thioredoxin reductase inhibitor auranofin triggers apoptosis through a Bax/Bak-dependent process that involves peroxiredoxin 3 oxidation. *Biochem Pharmacol.* 2008; 76:1097–109. doi:10.1016/j.bcp.2008.08.021.
47. Fan C, Zheng W, Fu X, Li X, Wong YS, Chen T. Enhancement of auranofin-induced lung cancer cell apoptosis by selenocystine, a natural inhibitor of TrxR1 *in vitro* and *in vivo*. *Cell Death Dis.* 2014; 5: e1191. doi:10.1038/cddis.2014.132.
48. Liu C, Liu Z, Li M, Li X, Wong YS, Ngai SM, Zheng W, Zhang Y, Chen T. Enhancement of auranofin-induced apoptosis in MCF-7 human breast cells by selenocystine, a synergistic inhibitor of thioredoxin reductase. *PLoS One.* 2013; 8: e53945. doi:10.1371/journal.pone.0053945.
49. Liu JJ, Liu Q, Wei HL, Yi J, Zhao HS, Gao LP. Inhibition of thioredoxin reductase by auranofin induces apoptosis in adriamycin-resistant human K562 chronic myeloid leukemia cells. *Pharmazie.* 2011; 66:440–4. doi:
50. Marzano C, Gandin V, Folda A, Scutari G, Bindoli A, Rigobello MP. Inhibition of thioredoxin reductase by auranofin induces apoptosis in cisplatin-resistant human ovarian cancer cells. *Free Radic Biol Med.* 2007; 42:872–81. doi:10.1016/j.freeradbiomed.2006.12.021.
51. Pratesi A, Gabbiani C, Michelucci E, Ginanneschi M, Papini AM, Rubbiani R, Ott I, Messori L. Insights on the mechanism of thioredoxin reductase inhibition by gold N-heterocyclic carbene compounds using the synthetic linear selenocysteine containing C-terminal peptide hTrxR(488-499): an ESI-MS investigation. *J Inorg Biochem.* 2014; 136:161–9. doi:10.1016/j.jinorgbio.2014.01.009.
52. Di Sarra F, B. F, Bini R, Saielli G, Bagno A. Reactivity of Auranofin with Selenols and Thiols - Implications for the Anticancer Activity of Gold(I) Compounds. *Eur J Inorg Chem.* 2013; 2013:2718–27. doi:10.1002/ejic.201300058.
53. Rigobello MP, Messori L, Marcon G, Agostina Cinellu M, Bragadin M, Folda A, Scutari G, Bindoli A. Gold complexes inhibit mitochondrial thioredoxin reductase: consequences on mitochondrial functions. *J Inorg Biochem.* 2004; 98:1634–41. doi:10.1016/j.jinorgbio.2004.04.020.
54. Gromer S, Arscott LD, Williams CH, Jr., Schirmer RH, Becker K. Human placenta thioredoxin reductase. Isolation of the selenoenzyme, steady state kinetics, and inhibition by therapeutic gold compounds. *J Biol Chem.* 1998; 273:20096–101. doi:
55. Wang Y, Hill KS, Fields AP. PKC $\alpha$  maintains a tumor-initiating cell phenotype that is required for ovarian tumorigenesis. *Mol Cancer Res.* 2013; 11:1624–35. doi:10.1158/1541-7786.MCR-13-0371-T.
56. Roder C, Thomson MJ. Auranofin: repurposing an old drug for a golden new age. *Drugs R D.* 2015; 15:13–20. doi:10.1007/s40268-015-0083-y.
57. Kean WF, Kean IR. Clinical pharmacology of gold. *Inflammopharmacology.* 2008; 16:112–25. doi:10.1007/s10787-007-0021-x.
58. Fiskus W, Saba N, Shen M, Ghias M, Liu J, Gupta SD, Chauhan L, Rao R, Gunewardena S, Schorno K, Austin CP, Maddocks K, Byrd J, et al. Auranofin induces lethal oxidative and endoplasmic reticulum stress and exerts potent preclinical activity against chronic lymphocytic leukemia. *Cancer Res.* 2014; 74:2520–32. doi:10.1158/0008-5472.CAN-13-2033.
59. Park SH, Lee JH, Berek JS, Hu MC. Auranofin displays anticancer activity against ovarian cancer cells through FOXO3 activation independent of p53. *Int J Oncol.* 2014; 45:1691–8. doi:10.3892/ijo.2014.2579.
60. Kim NH, Park HJ, Oh MK, Kim IS. Antiproliferative effect of gold(I) compound auranofin through inhibition of STAT3 and telomerase activity in MDA-MB 231 human breast cancer cells. *BMB Rep.* 2013; 46:59–64. doi:
61. Nakaya A, Sagawa M, Muto A, Uchida H, Ikeda Y, Kizaki M. The gold compound auranofin induces apoptosis of human multiple myeloma cells through both down-regulation of STAT3 and inhibition of NF- $\kappa$ B activity. *Leuk Res.* 2011; 35:243–9. doi:10.1016/j.leukres.2010.05.011.
62. Liu N, Li X, Huang H, Zhao C, Liao S, Yang C, Liu S, Song W, Lu X, Lan X, Chen X, Yi S, Xu L, et al. Clinically used antirheumatic agent auranofin is a proteasomal deubiquitinase inhibitor and inhibits tumor growth. *Oncotarget.* 2014; 5:5453–71. doi: 10.18632/oncotarget.2113.
63. Tepperman K, Finer R, Donovan S, Elder RC, Doi J, Ratliff D, Ng K. Intestinal uptake and metabolism of auranofin, a new oral gold-based antiarthritis drug. *Science.* 1984; 225:430–2. doi:
64. Kean WF, Hart L, Buchanan WW. Auranofin. *Br J Rheumatol.* 1997; 36:560–72. doi:
65. Jatoi A, Radecki Breitkopf C, Foster NR, Block MS, Grudem M, Wahner Hendrickson A, Carlson RE, Barrette B, Karlin N, Fields AP. A mixed-methods feasibility trial of protein kinase C  $\alpha$  inhibition with auranofin in asymptomatic ovarian cancer patients. *Oncology.* 2015; 88:208–13. doi:10.1159/000369257.
66. Du X, Li Y, Jing X, Zhao L. Effect of a heat shock protein 90-specific inhibitor on the proliferation and apoptosis induced by VEGF-C in cervical cancer cells. *Exp Ther Med.* 2014; 8:1559–64. doi:10.3892/etm.2014.1930.
67. Singh A, Singh A, Sand JM, Bauer SJ, Bin Hafeez B, Meske L, Verma AK. Topically Applied Hsp90 Inhibitor 17AAG Inhibits Ultraviolet Radiation-Induced Cutaneous Squamous Cell Carcinomas. *J Invest Dermatol.* 2014. doi:10.1038/jid.2014.460.
68. Jhaveri K, Taldone T, Modi S, Chiosis G. Advances in the clinical development of heat shock protein 90 (Hsp90) inhibitors in cancers. *Biochim Biophys Acta.* 2012; 1823:742–55. doi:10.1016/j.bbamer.2011.10.008.
69. Yu Y, Szczepek AJ, Haupt H, Mazurek B. Geldanamycin induces production of heat shock protein 70 and partially attenuates ototoxicity caused by gentamicin in the organ of Corti explants. *J Biomed Sci.* 2009; 16: 79. doi:10.1186/1423-0127-16-79.



70. Proia DA, Bates RC. Ganetespib and HSP90: translating preclinical hypotheses into clinical promise. *Cancer Res.* 2014; 74:1294–300. doi:10.1158/0008-5472.CAN-13-3263.
71. Eccles SA, Massey A, Raynaud FI, Sharp SY, Box G, Valenti M, Patterson L, de Haven Brandon A, Gowan S, Boxall F, Aherne W, Rowlands M, Hayes A, et al. NVP-AUY922: a novel heat shock protein 90 inhibitor active against xenograft tumor growth, angiogenesis, and metastasis. *Cancer Res.* 2008; 68:2850–60. doi:10.1158/0008-5472.CAN-07-5256.
72. Shimamura T, Perera SA, Foley KP, Sang J, Rodig SJ, Inoue T, Chen L, Li D, Carretero J, Li YC, Sinha P, Carey CD, Borgman CL, et al. Ganetespib (STA-9090), a nongeldanamycin HSP90 inhibitor, has potent antitumor activity in *in vitro* and *in vivo* models of non-small cell lung cancer. *Clin Cancer Res.* 2012; 18:4973–85. doi:10.1158/1078-0432.CCR-11-2967.
73. Sessa C, Shapiro GI, Bhalla KN, Britten C, Jacks KS, Mita M, Papadimitrakopoulou V, Pluard T, Samuel TA, Akimov M, Quadt C, Fernandez-Ibarra C, Lu H, et al. First-in-human phase I dose-escalation study of the HSP90 inhibitor AUY922 in patients with advanced solid tumors. *Clin Cancer Res.* 2013; 19:3671–80. doi:10.1158/1078-0432.CCR-12-3404.
74. Martinez-Ramirez A, Rodriguez-Perales S, Melendez B, Martinez-Delgado B, Urioste M, Cigudosa JC, Benitez J. Characterization of the A673 cell line (Ewing tumor) by molecular cytogenetic techniques. *Cancer Genet Cytogenet.* 2003; 141:138–42. doi:
75. Kauer M, Ban J, Kofler R, Walker B, Davis S, Meltzer P, Kovar H. A molecular function map of Ewing's sarcoma. *PLoS One.* 2009; 4: e5415. doi:10.1371/journal.pone.0005415.
76. Hancock JD, Lessnick SL. A transcriptional profiling meta-analysis reveals a core EWS-FLI gene expression signature. *Cell Cycle.* 2008; 7:250–6. doi:
77. Prieur A, Tirode F, Cohen P, Delattre O. EWS/FLI-1 silencing and gene profiling of Ewing cells reveal downstream oncogenic pathways and a crucial role for repression of insulin-like growth factor binding protein 3. *Mol Cell Biol.* 2004; 24:7275–83. doi:10.1128/MCB.24.16.7275-7283.2004.
78. Schaefer KL, Eisenacher M, Braun Y, Brachwitz K, Wai DH, Dirksen U, Lanvers-Kaminsky C, Juergens H, Herrero D, Stegmaier S, Koscielniak E, Eggert A, Nathrath M, et al. Microarray analysis of Ewing's sarcoma family of tumours reveals characteristic gene expression signatures associated with metastasis and resistance to chemotherapy. *Eur J Cancer.* 2008; 44:699–709. doi:10.1016/j.ejca.2008.01.020.
79. Lamb J, Crawford ED, Peck D, Modell JW, Blat IC, Wrobel MJ, Lerner J, Brunet JP, Subramanian A, Ross KN, Reich M, Hieronymus H, Wei G, et al. The Connectivity Map: using gene-expression signatures to connect small molecules, genes, and disease. *Science.* 2006; 313: 1929–35. doi:
80. Inglese J, Shamu CE, Guy RK. Reporting data from high-throughput screening of small-molecule libraries. *Nature chemical biology.* 2007; 3:438–41. doi:10.1038/nchembio0807-438.
81. Chou TC. Drug combination studies and their synergy quantification using the Chou-Talalay method. *Cancer Res.* 2010; 70:440–6. doi:10.1158/0008-5472.can-09-1947.
82. Chou TC. The mass-action law based algorithm for cost-effective approach for cancer drug discovery and development. *Am J Cancer Res.* 2011; 1:925–54. doi:
83. Chou TC. Theoretical basis, experimental design, and computerized simulation of synergism and antagonism in drug combination studies. *Pharmacol Rev.* 2006; 58:621–81. doi:10.1124/pr.58.3.10.
